# Supplementary material
Source: Springer Nature journal article supplement (https://www.springermedizin.de/resource/supplementary/13063_2010_506_MOESM2_ESM.pdf/9618364)

**Clinical influences:**  
Competing demands  
Knowledge of and agreement with clinical guidelines  
Organizational issues (ancillary support; follow-up appointments)  
Assessment of patient adherence

**Medication related factors:**  
Side effects  
Contraindications  
Cost  
Convenience/Dosing/Complexity  
Patient/Provider Medication knowledge

**Patient attitudes and values:**  
Diabetes-related knowledge  
Perceived risk  
Belief in treatment efficacy  
Health goals/values

**Other patient influences:**  
Cognitive skills (memory)  
Health literacy  
Autonomous motivation  
Self-efficacy  
Social support  
Environmental barriers  
General adherence  
Symptom burden  
Co-morbidities  
Diabetes-specific emotional distress  
Patient-provider communication

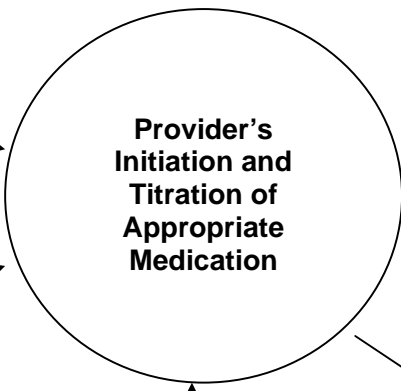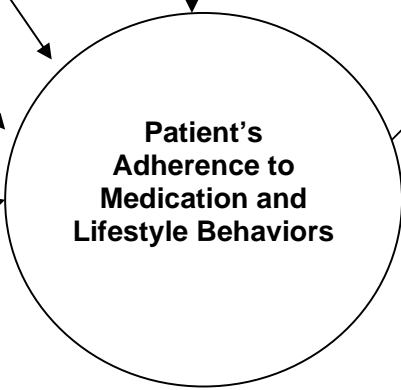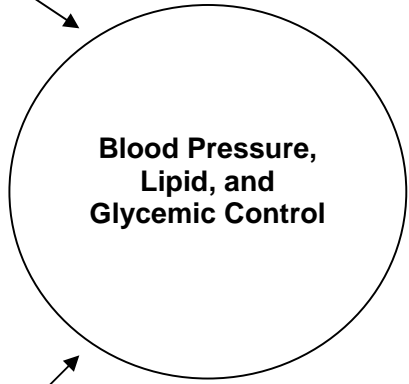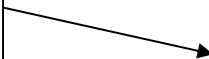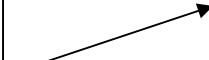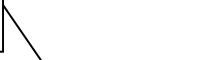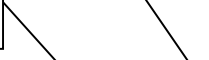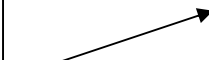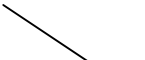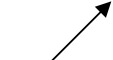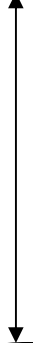

Supplement: MOESM2 [file 9618364]
